# Supplementary material for: The RNA-binding protein Rbm38 is dispensable during pressure overload-induced cardiac remodeling in mice
Source: PubMed Central journal article supplement (PMC5574583; doi:10.1371/journal.pone.0184093), 2017-08-29

# S2 Figure

A.

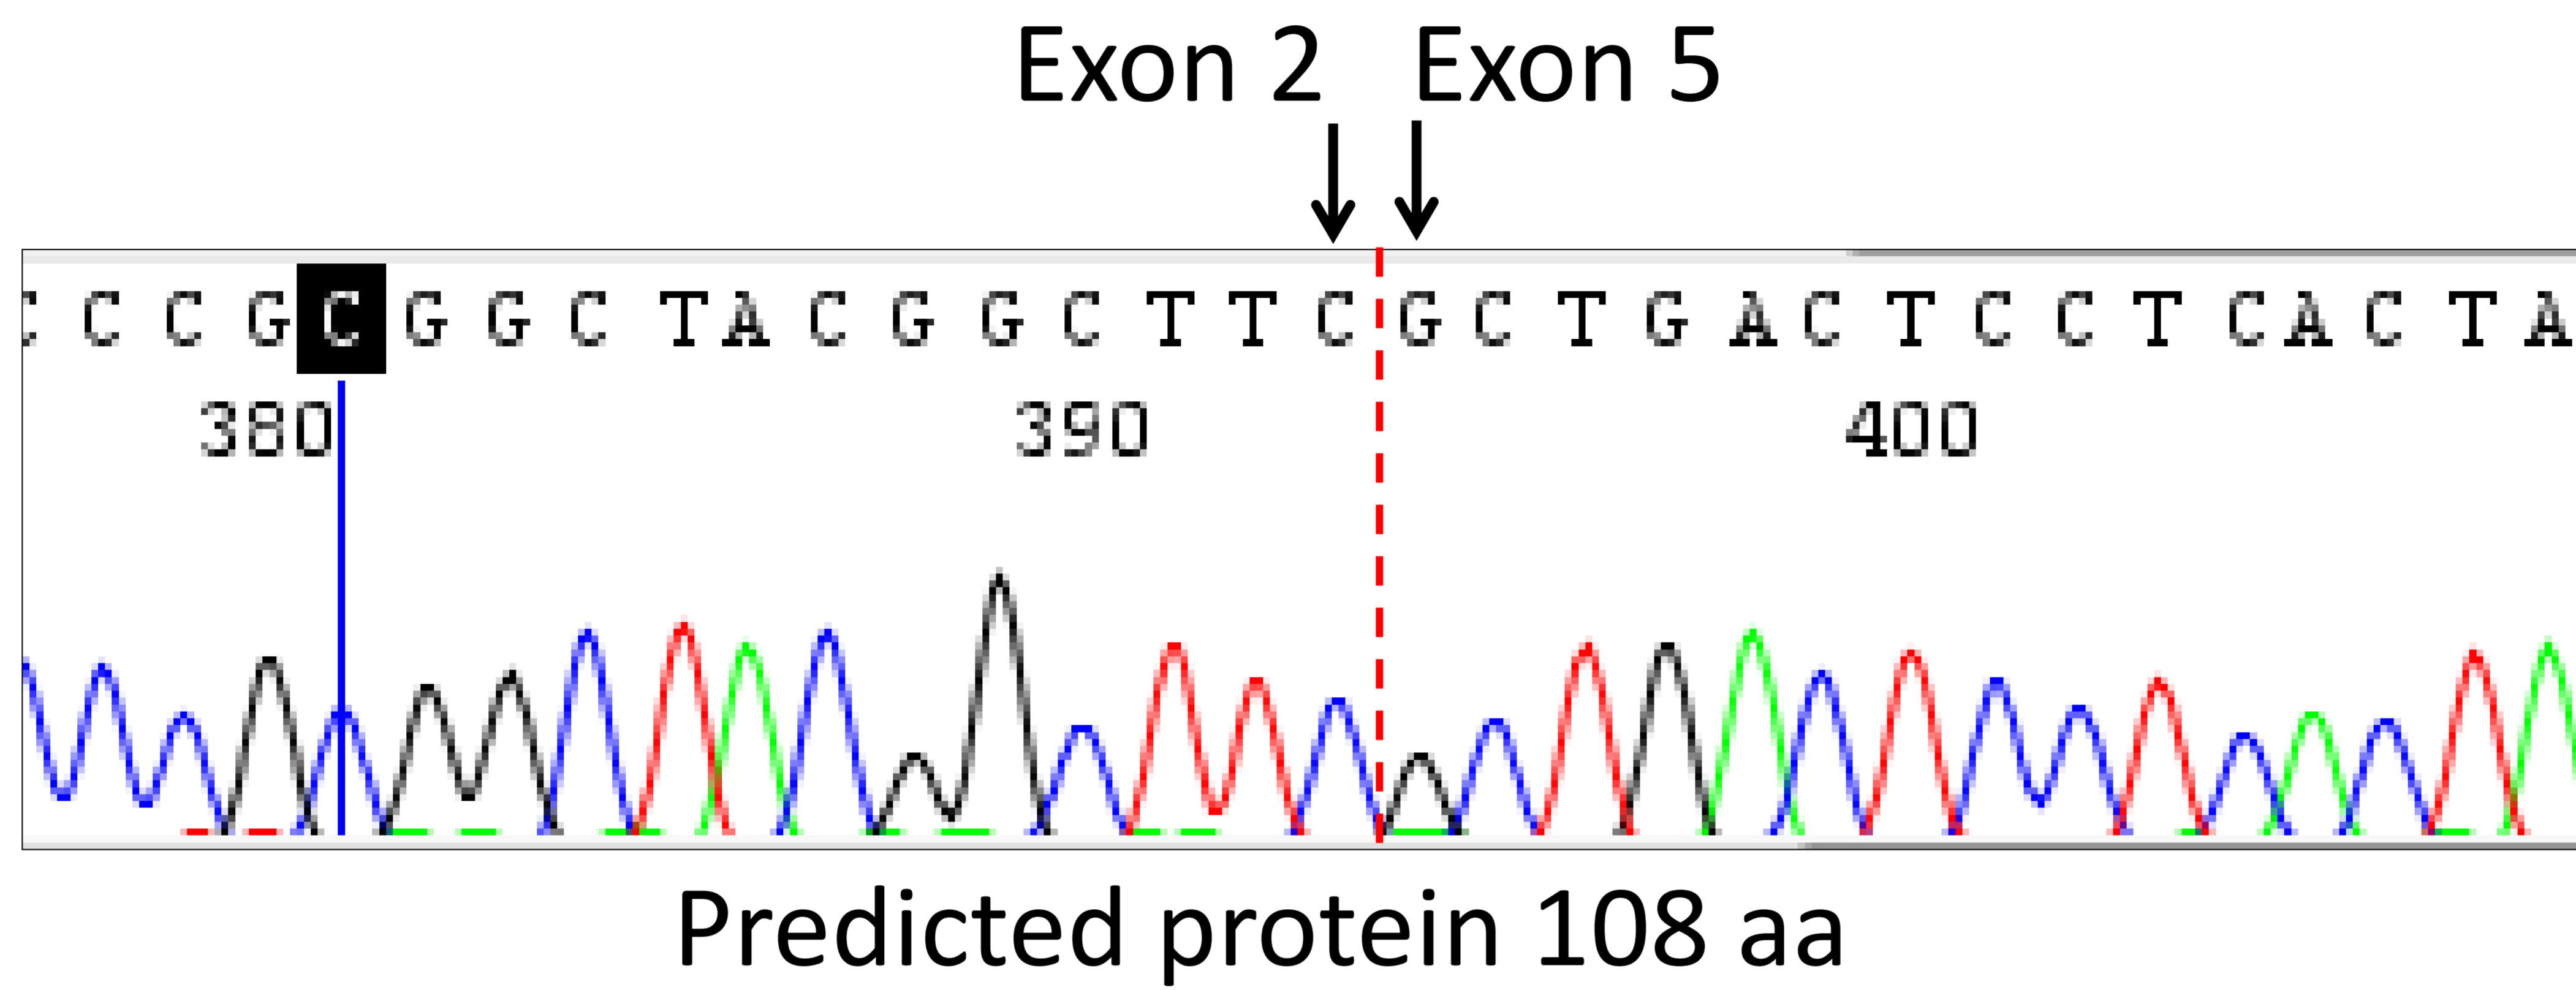

B.

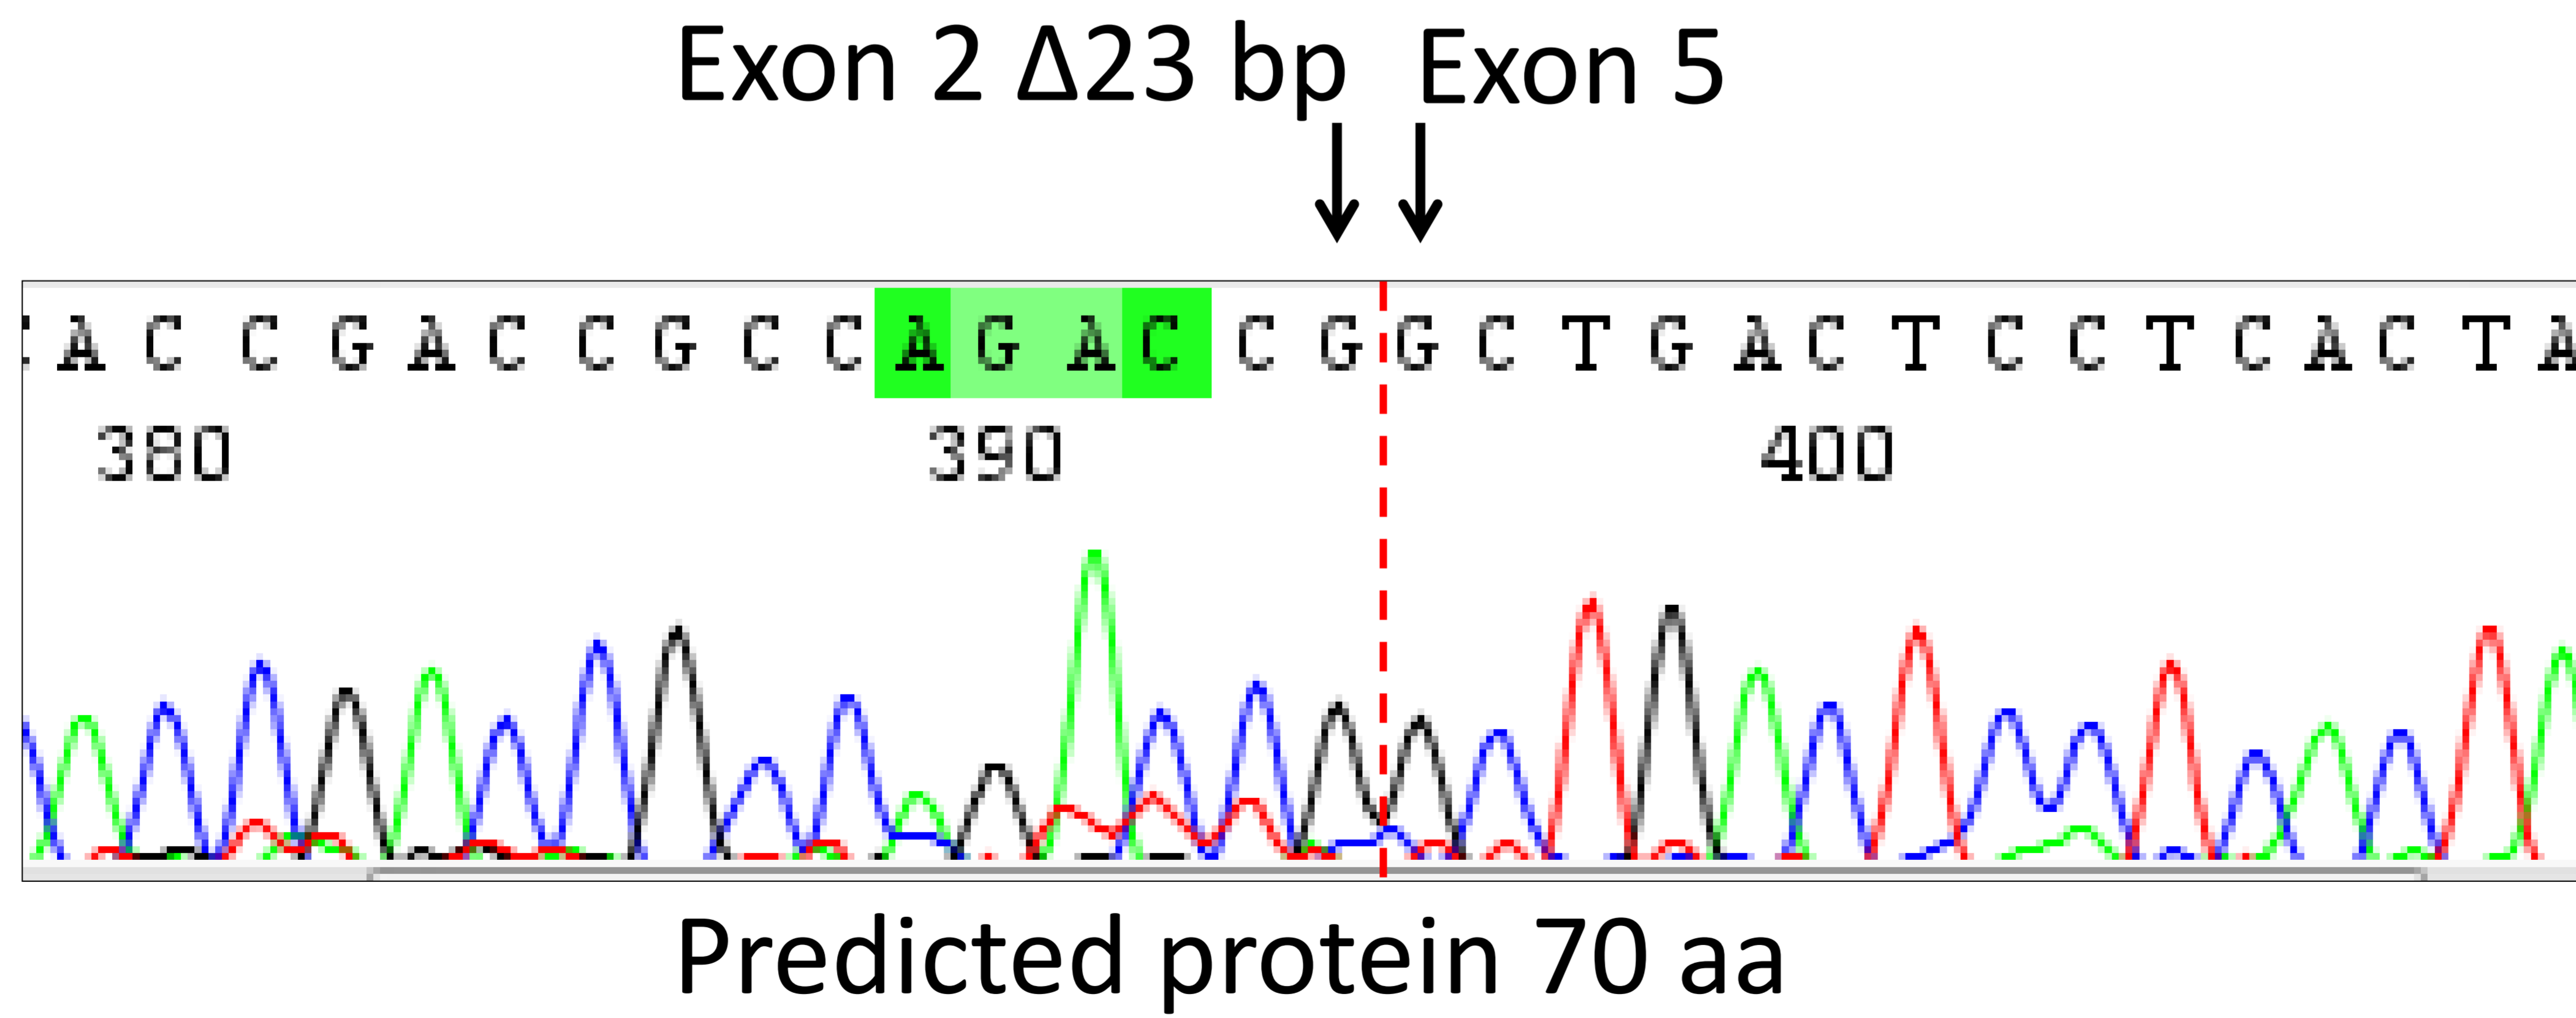

Supplement: pone.0184093.s002.pdf [file pone.0184093.s002.pdf]
