# Supplementary material for: The RNA-binding protein Rbm38 is dispensable during pressure overload-induced cardiac remodeling in mice
Source: PubMed Central journal article supplement (PMC5574583; doi:10.1371/journal.pone.0184093), 2017-08-29

# S4 Figure

A.

Rbm38

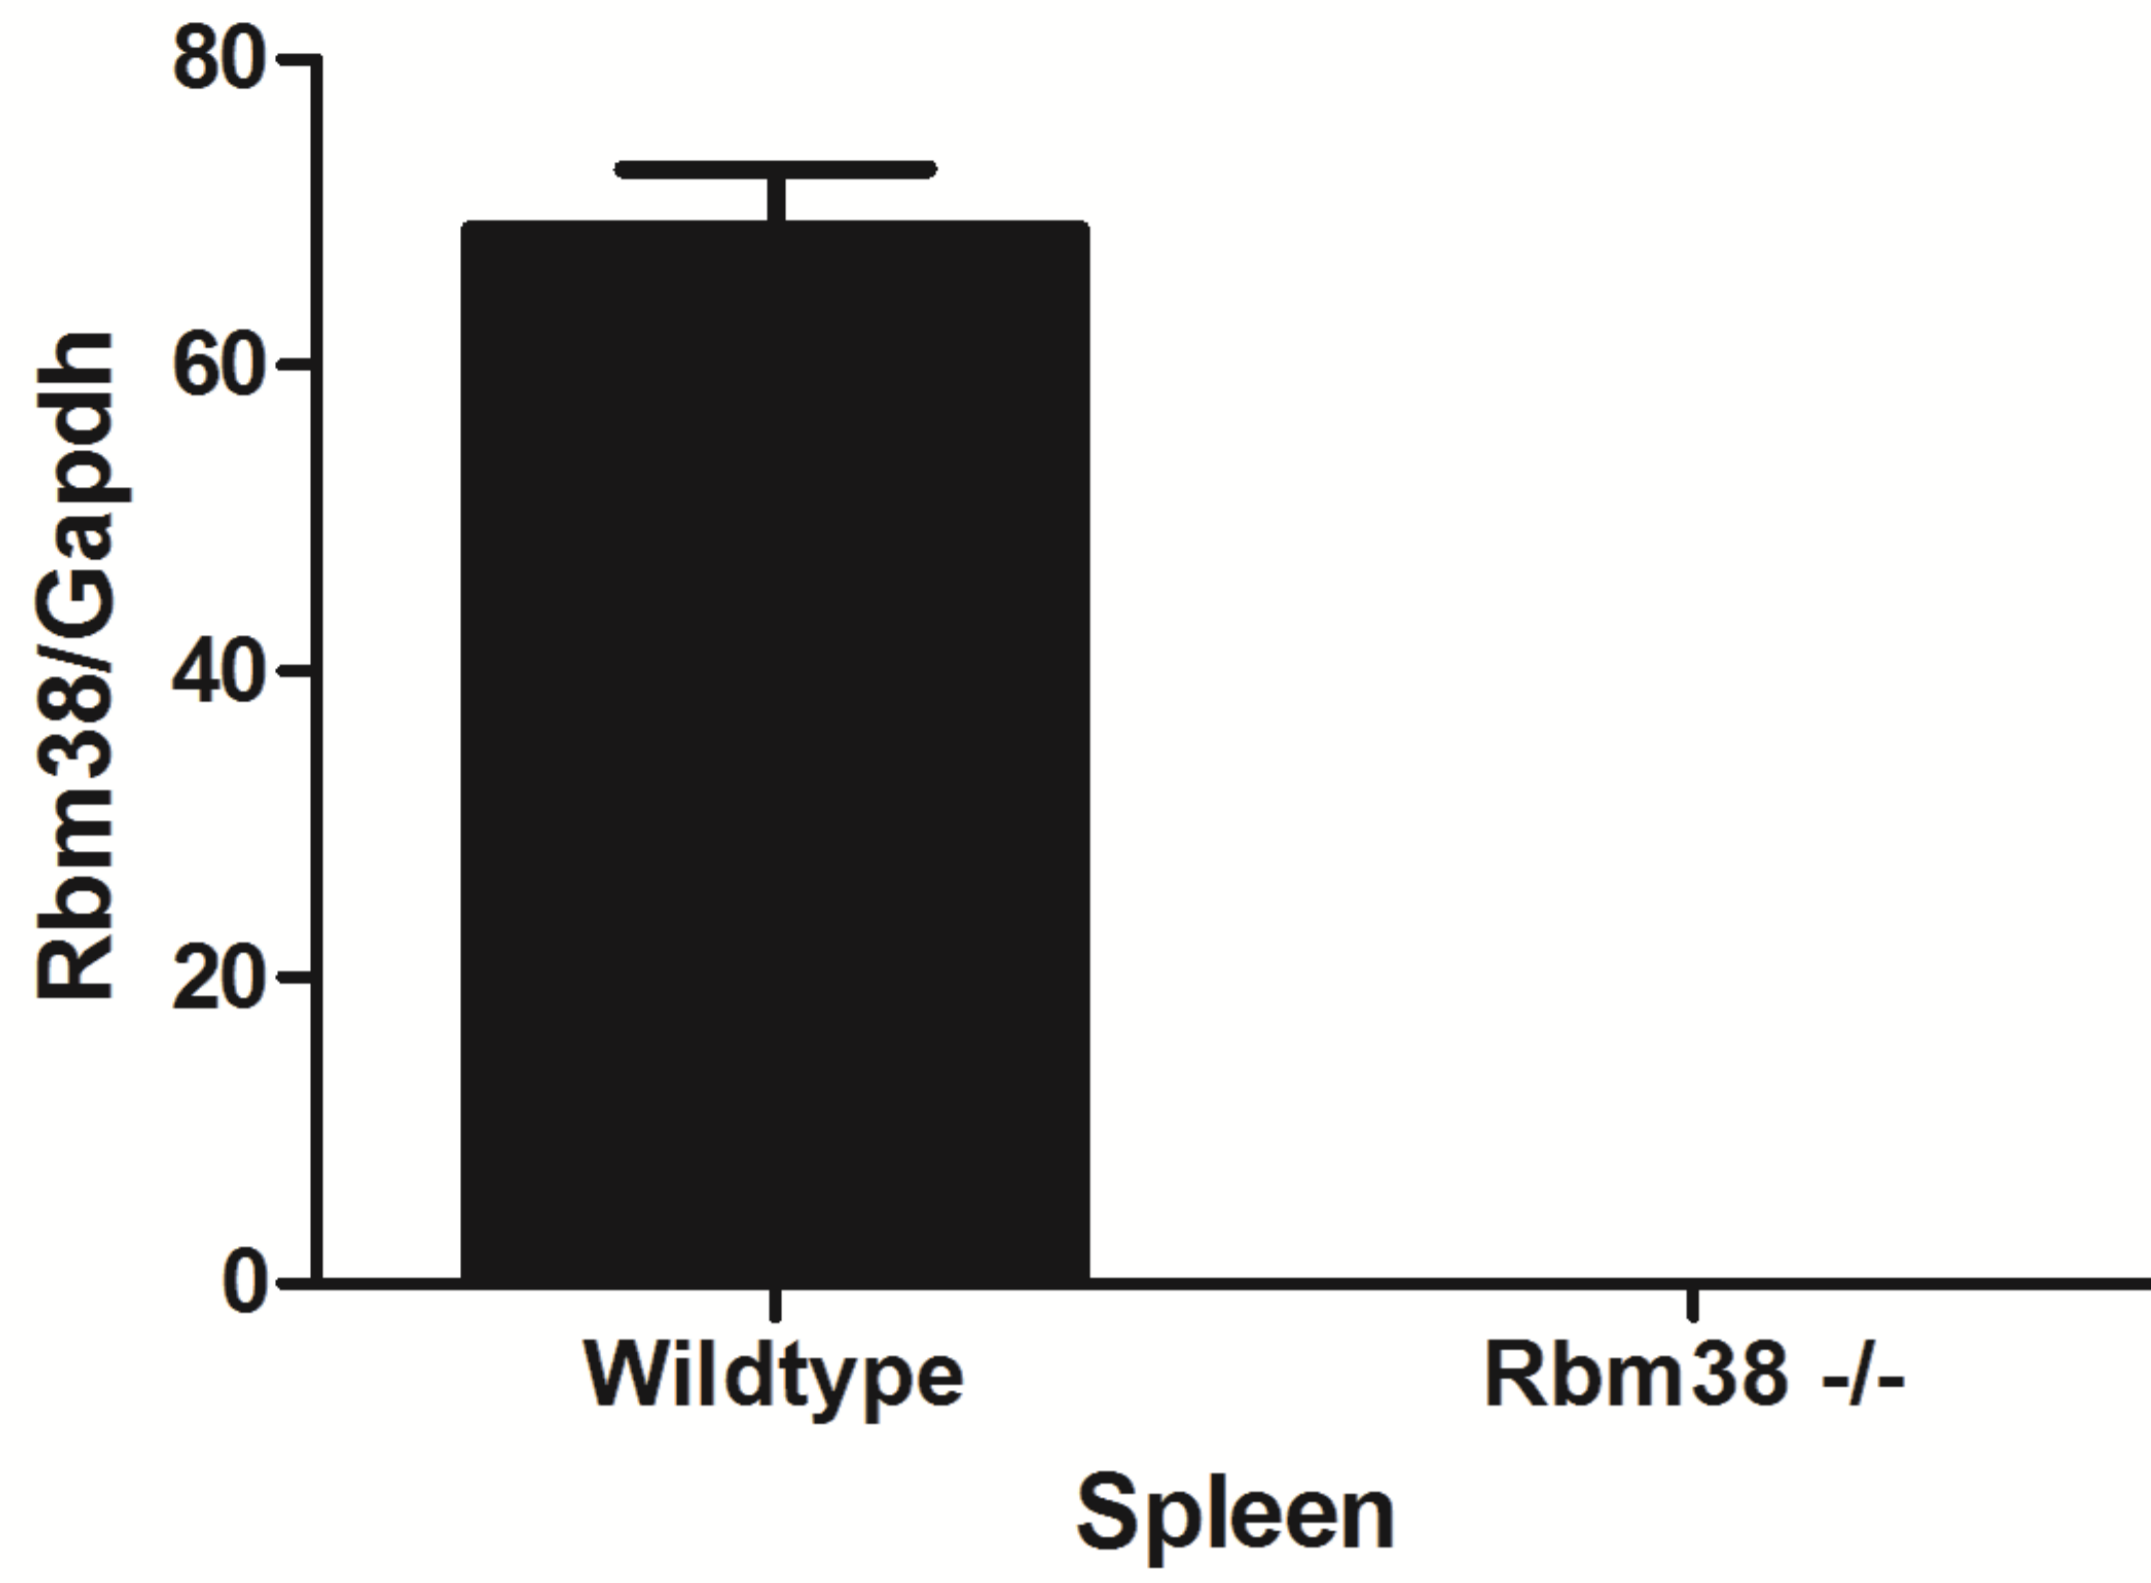

B.

HuR

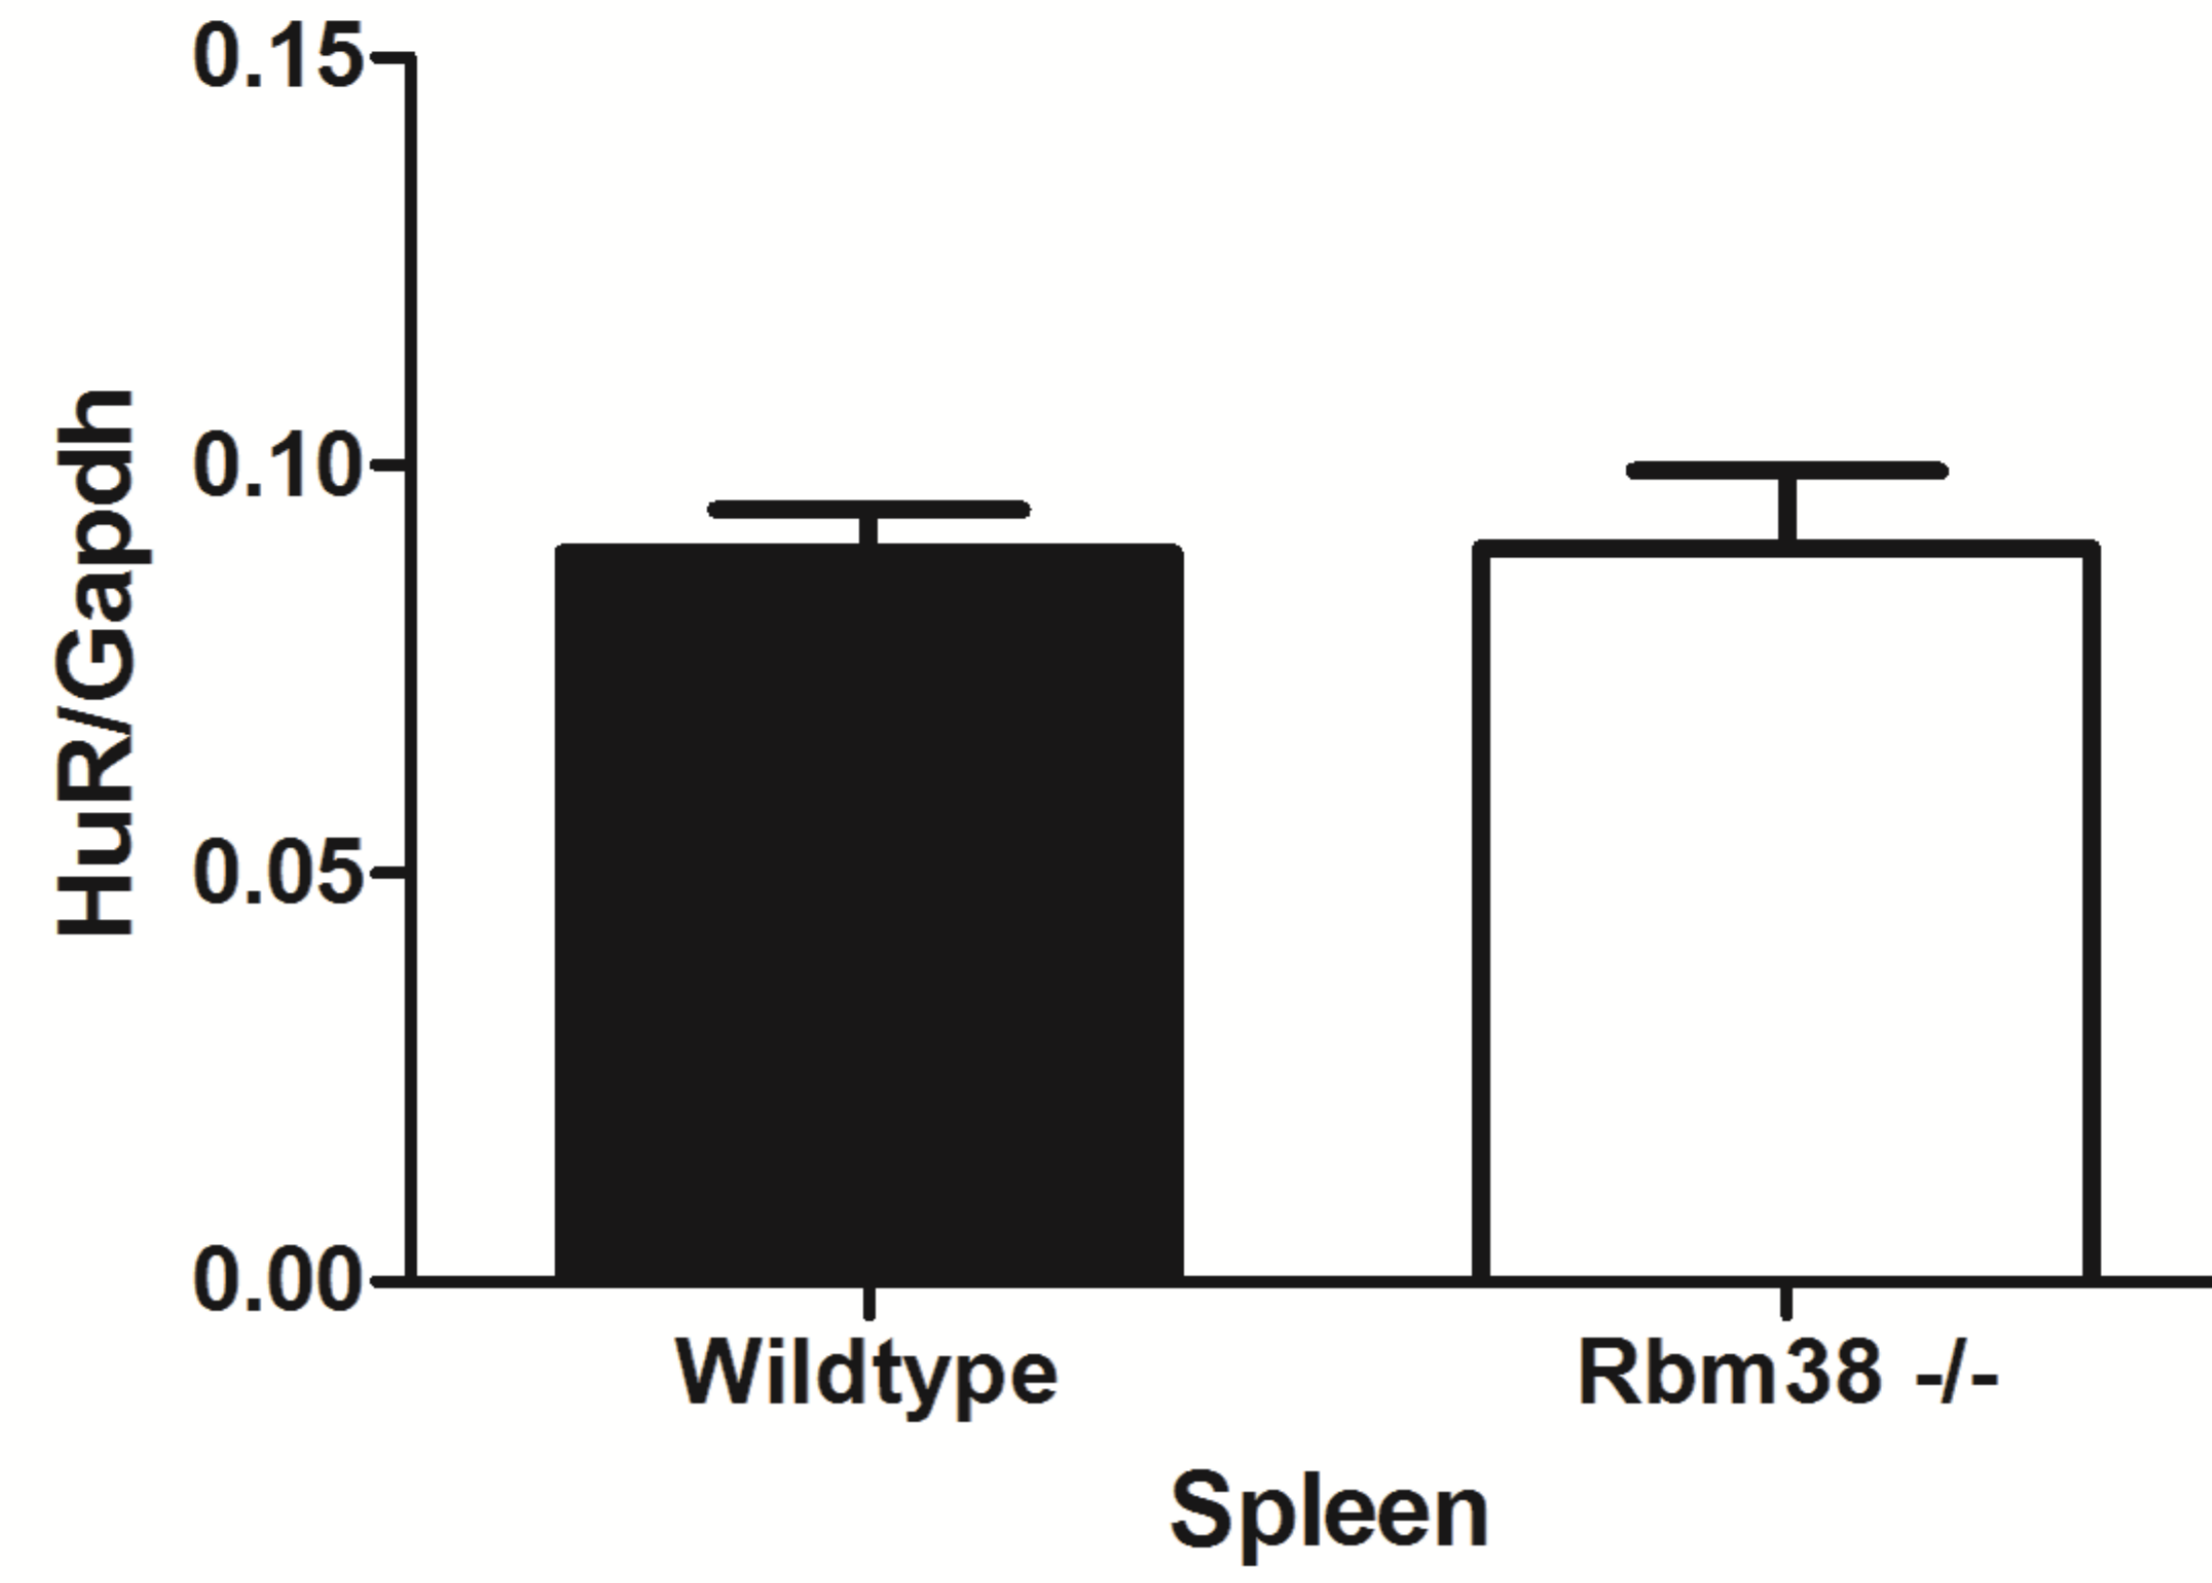

C.

p21

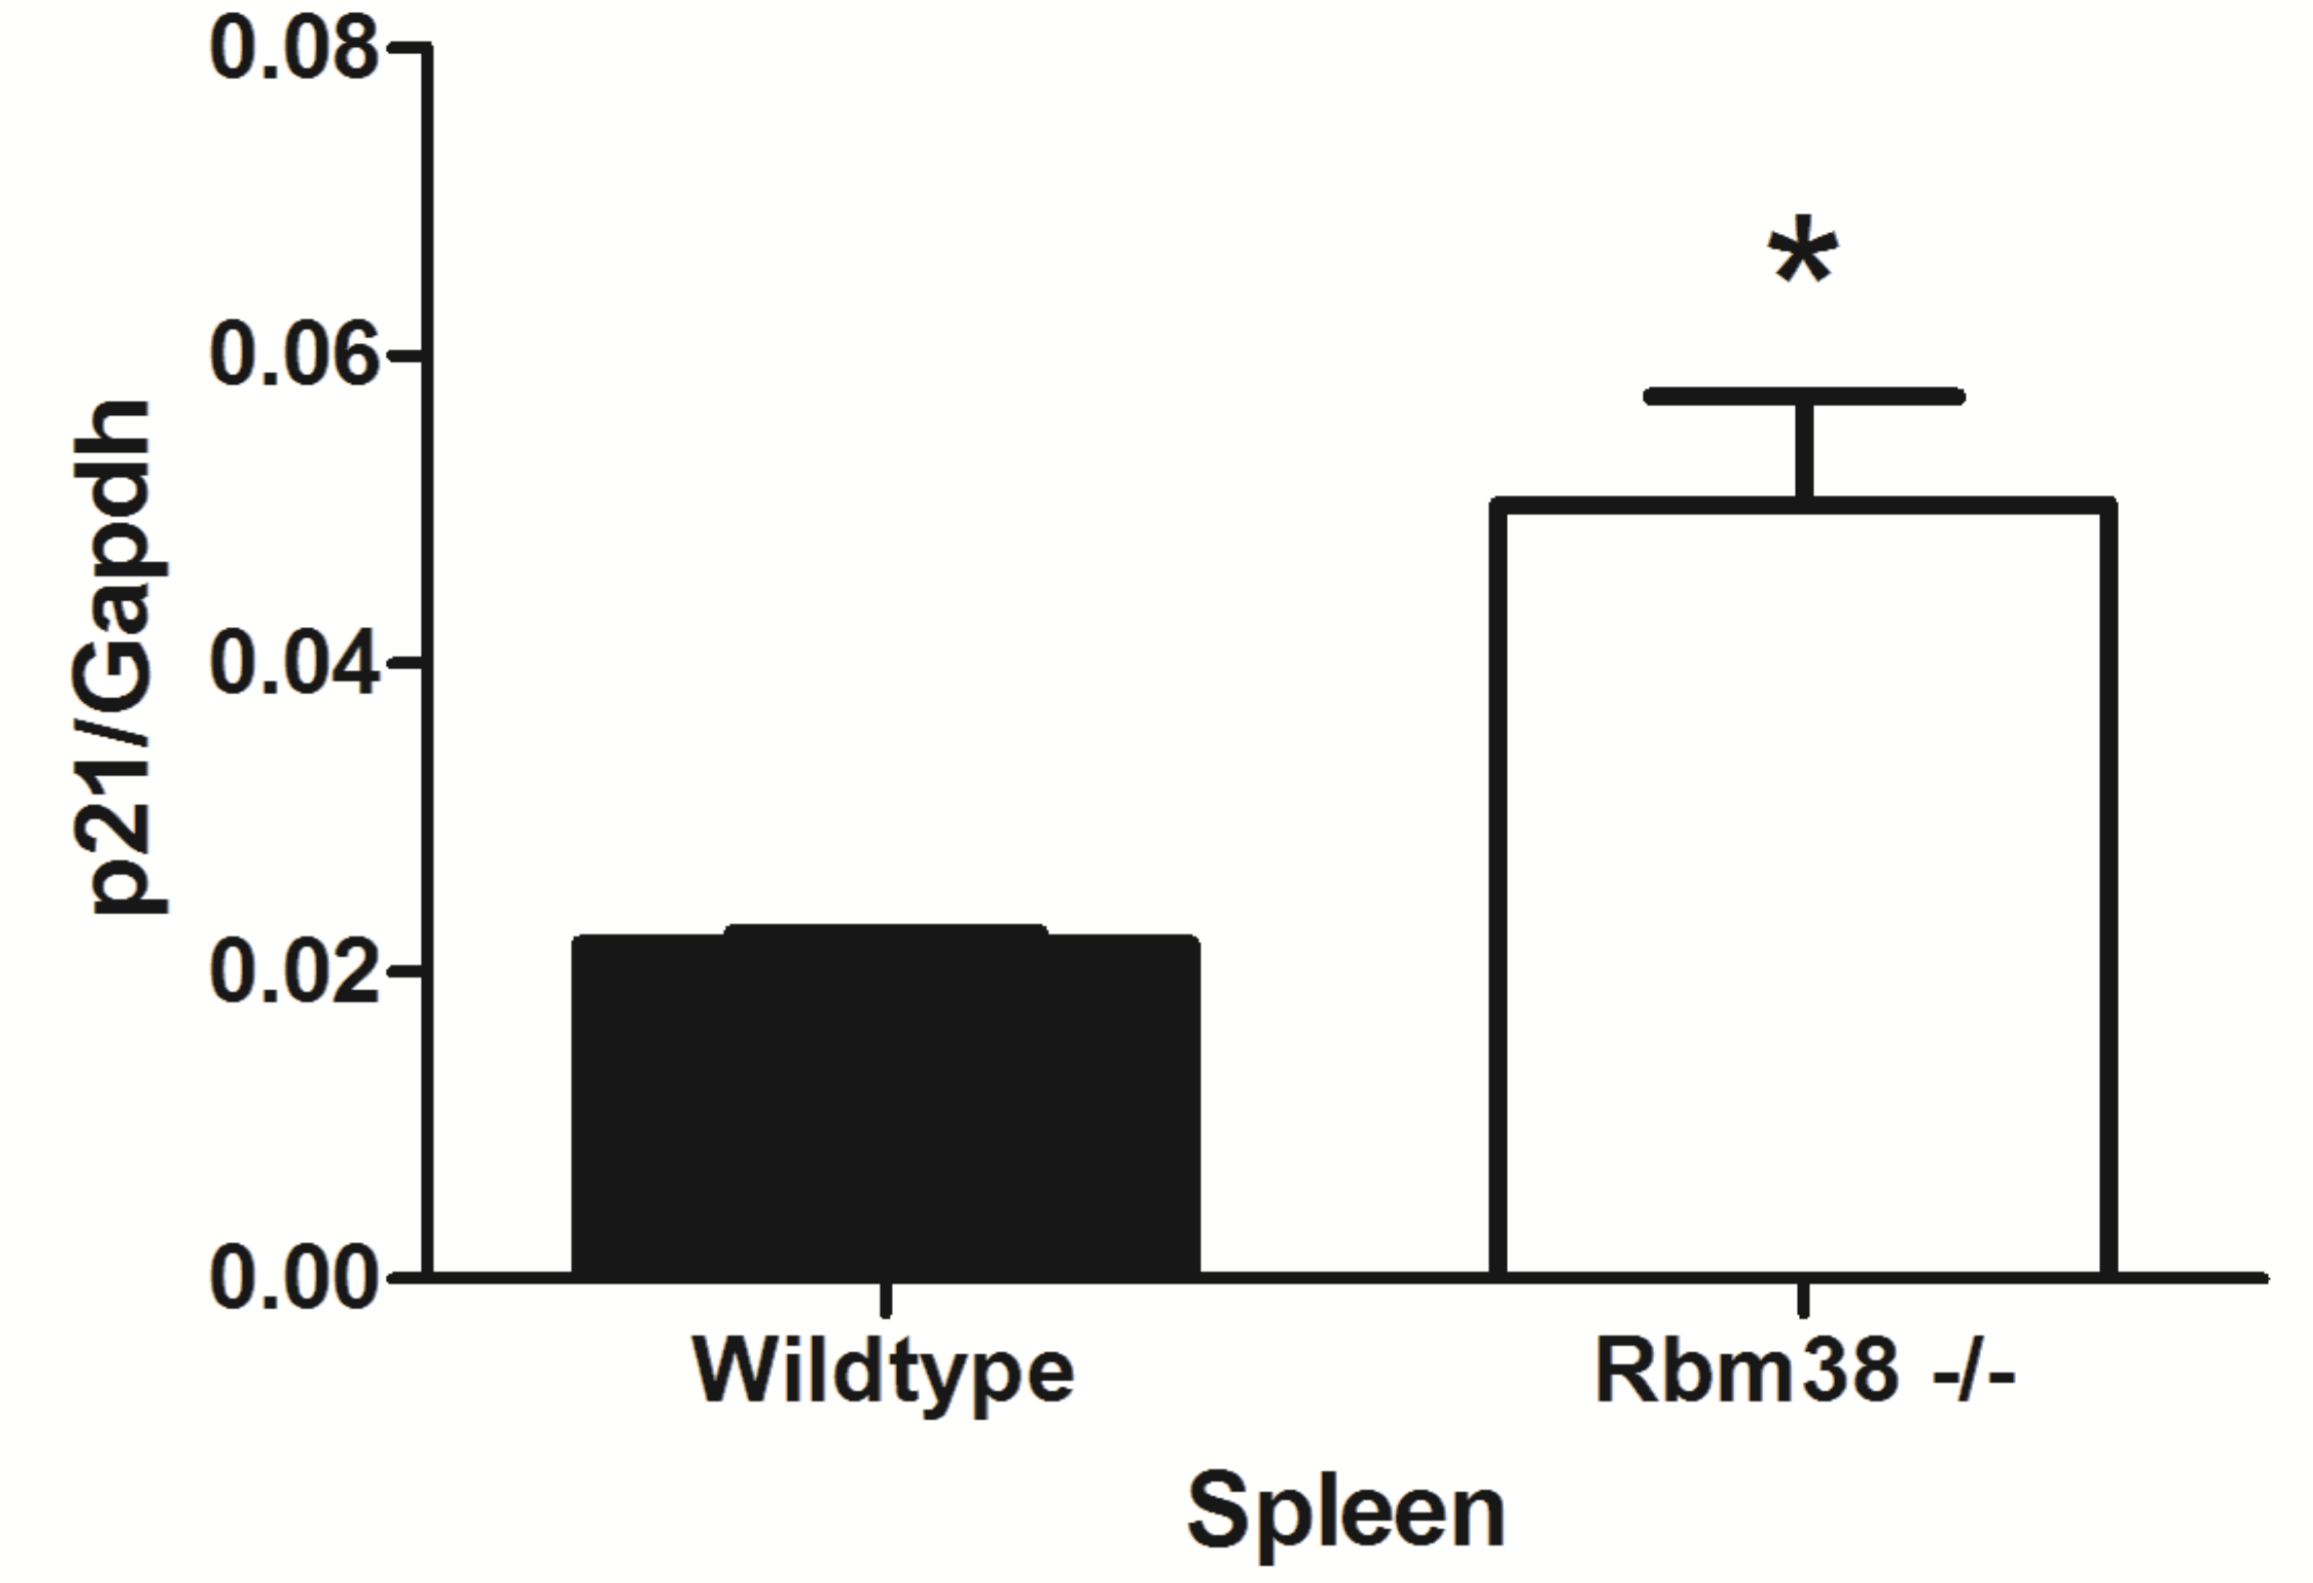

D.

Mef2d a1/a2 ratio

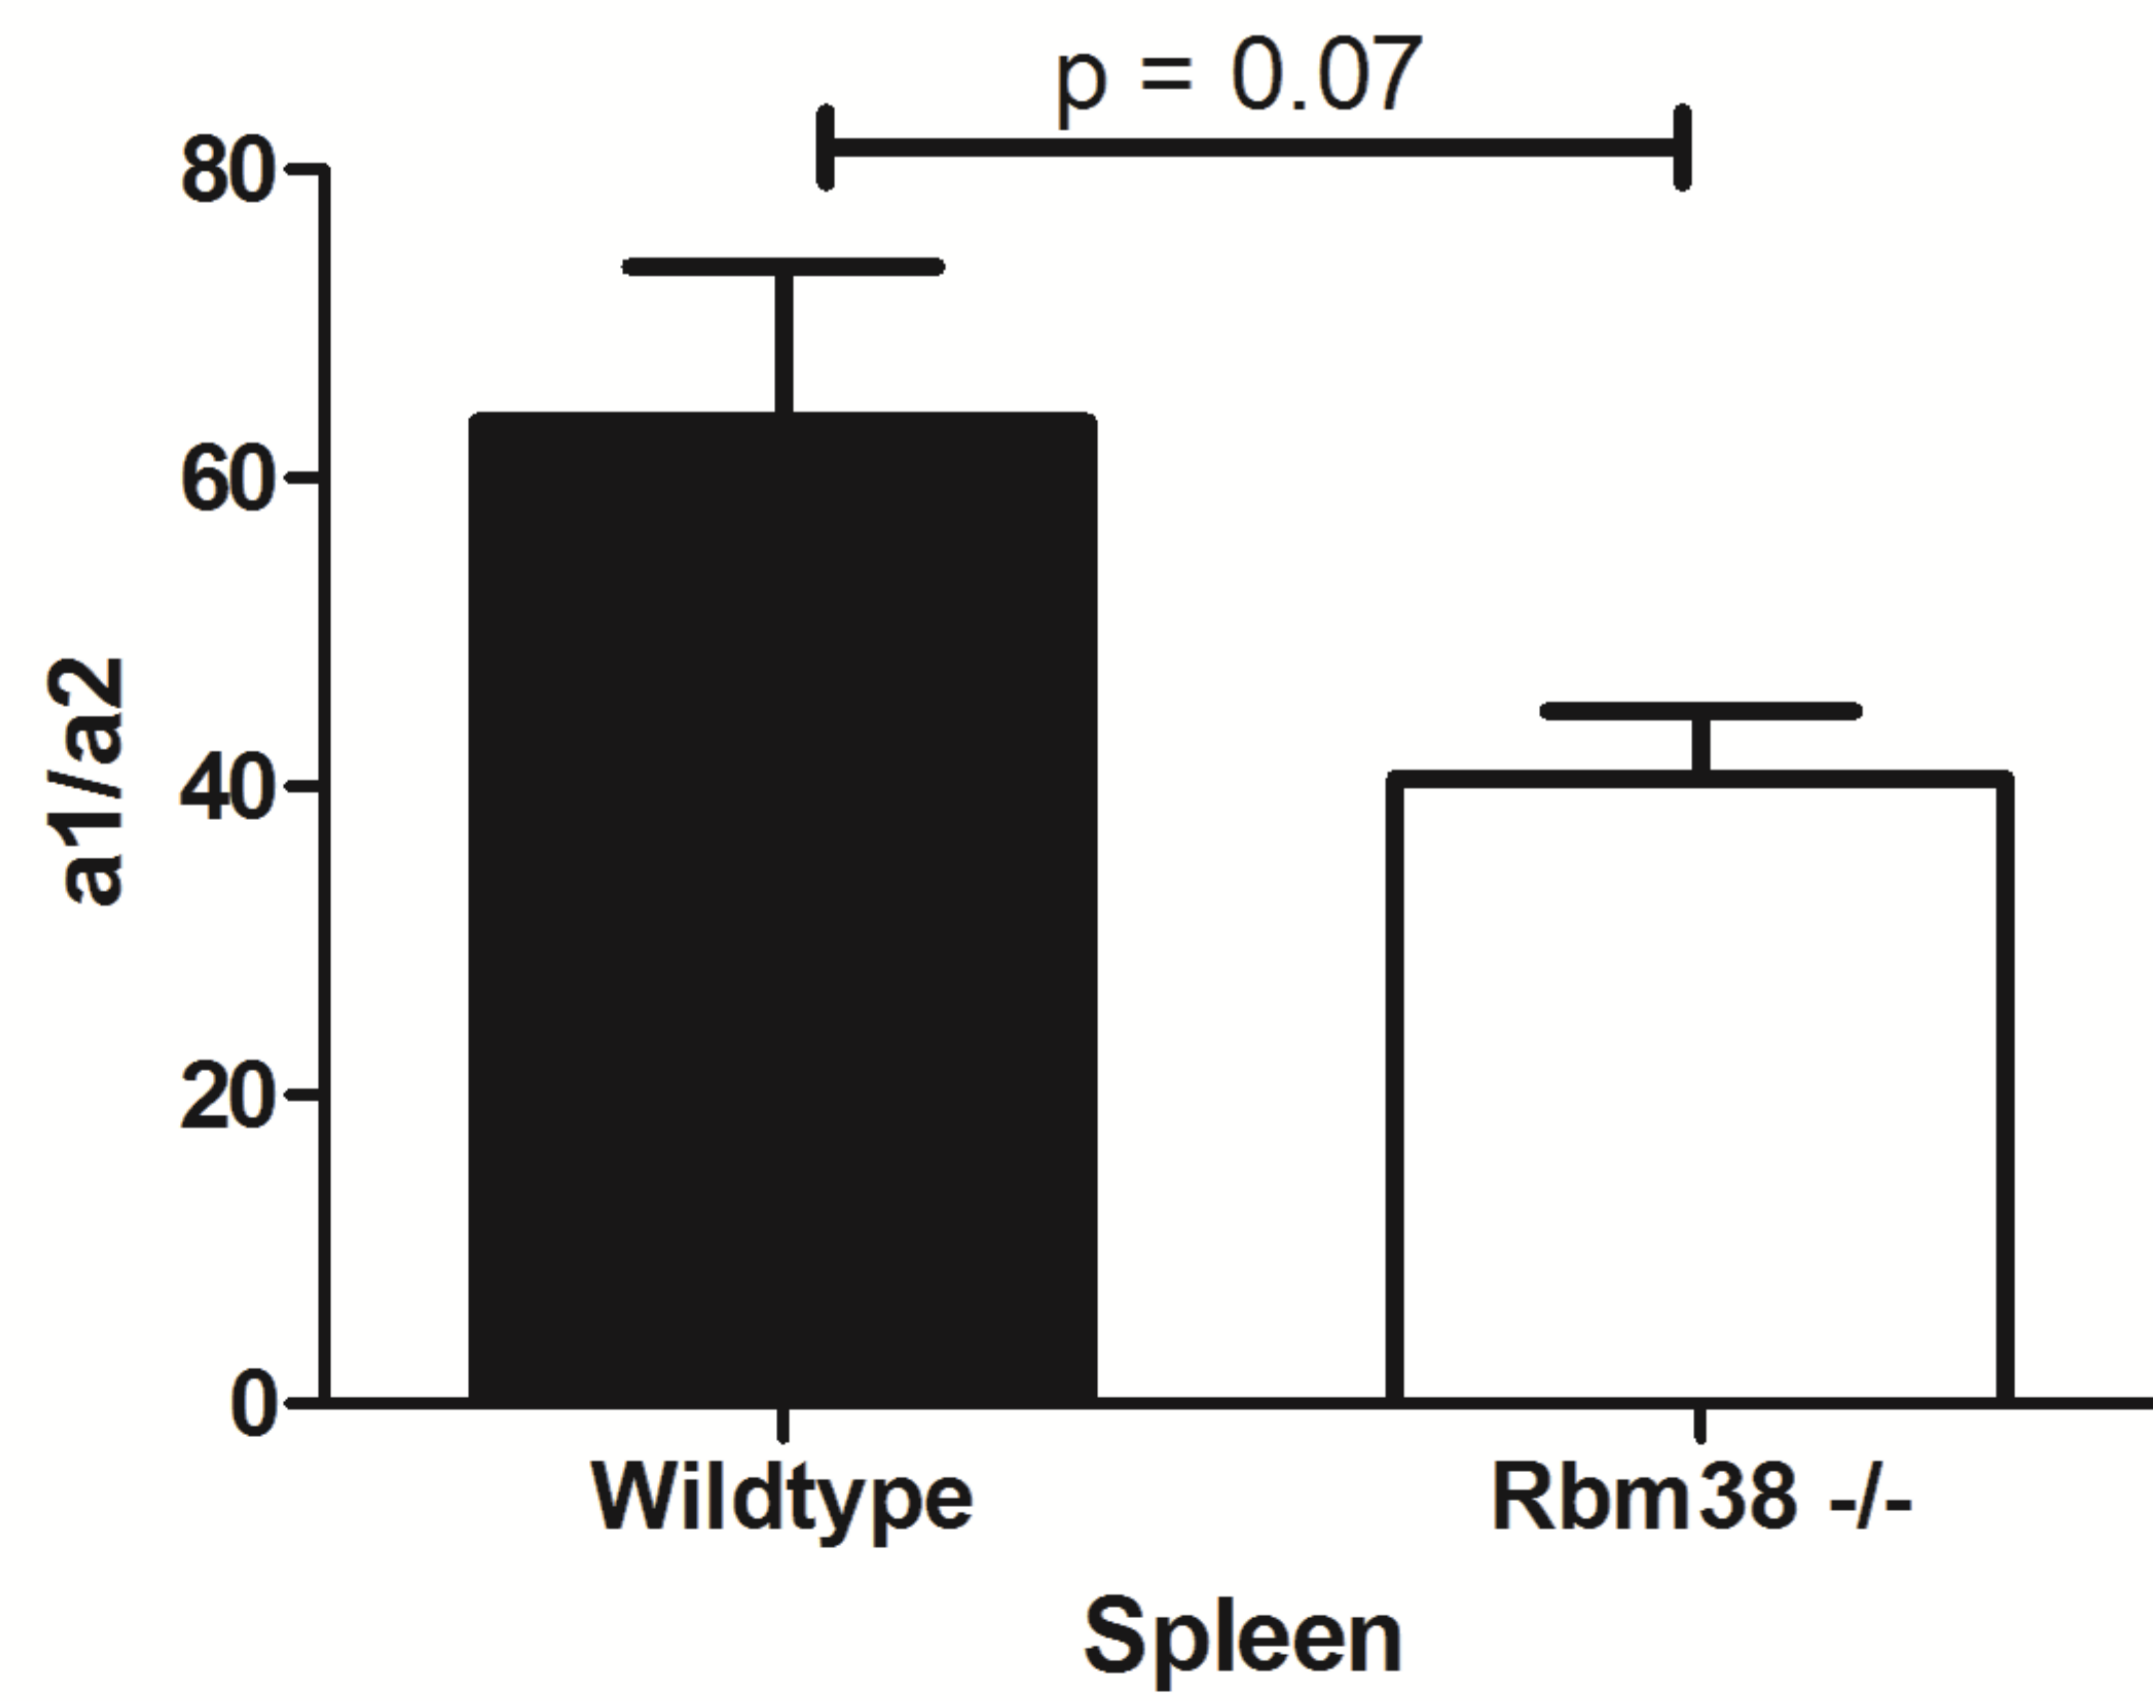

E.

TLR7

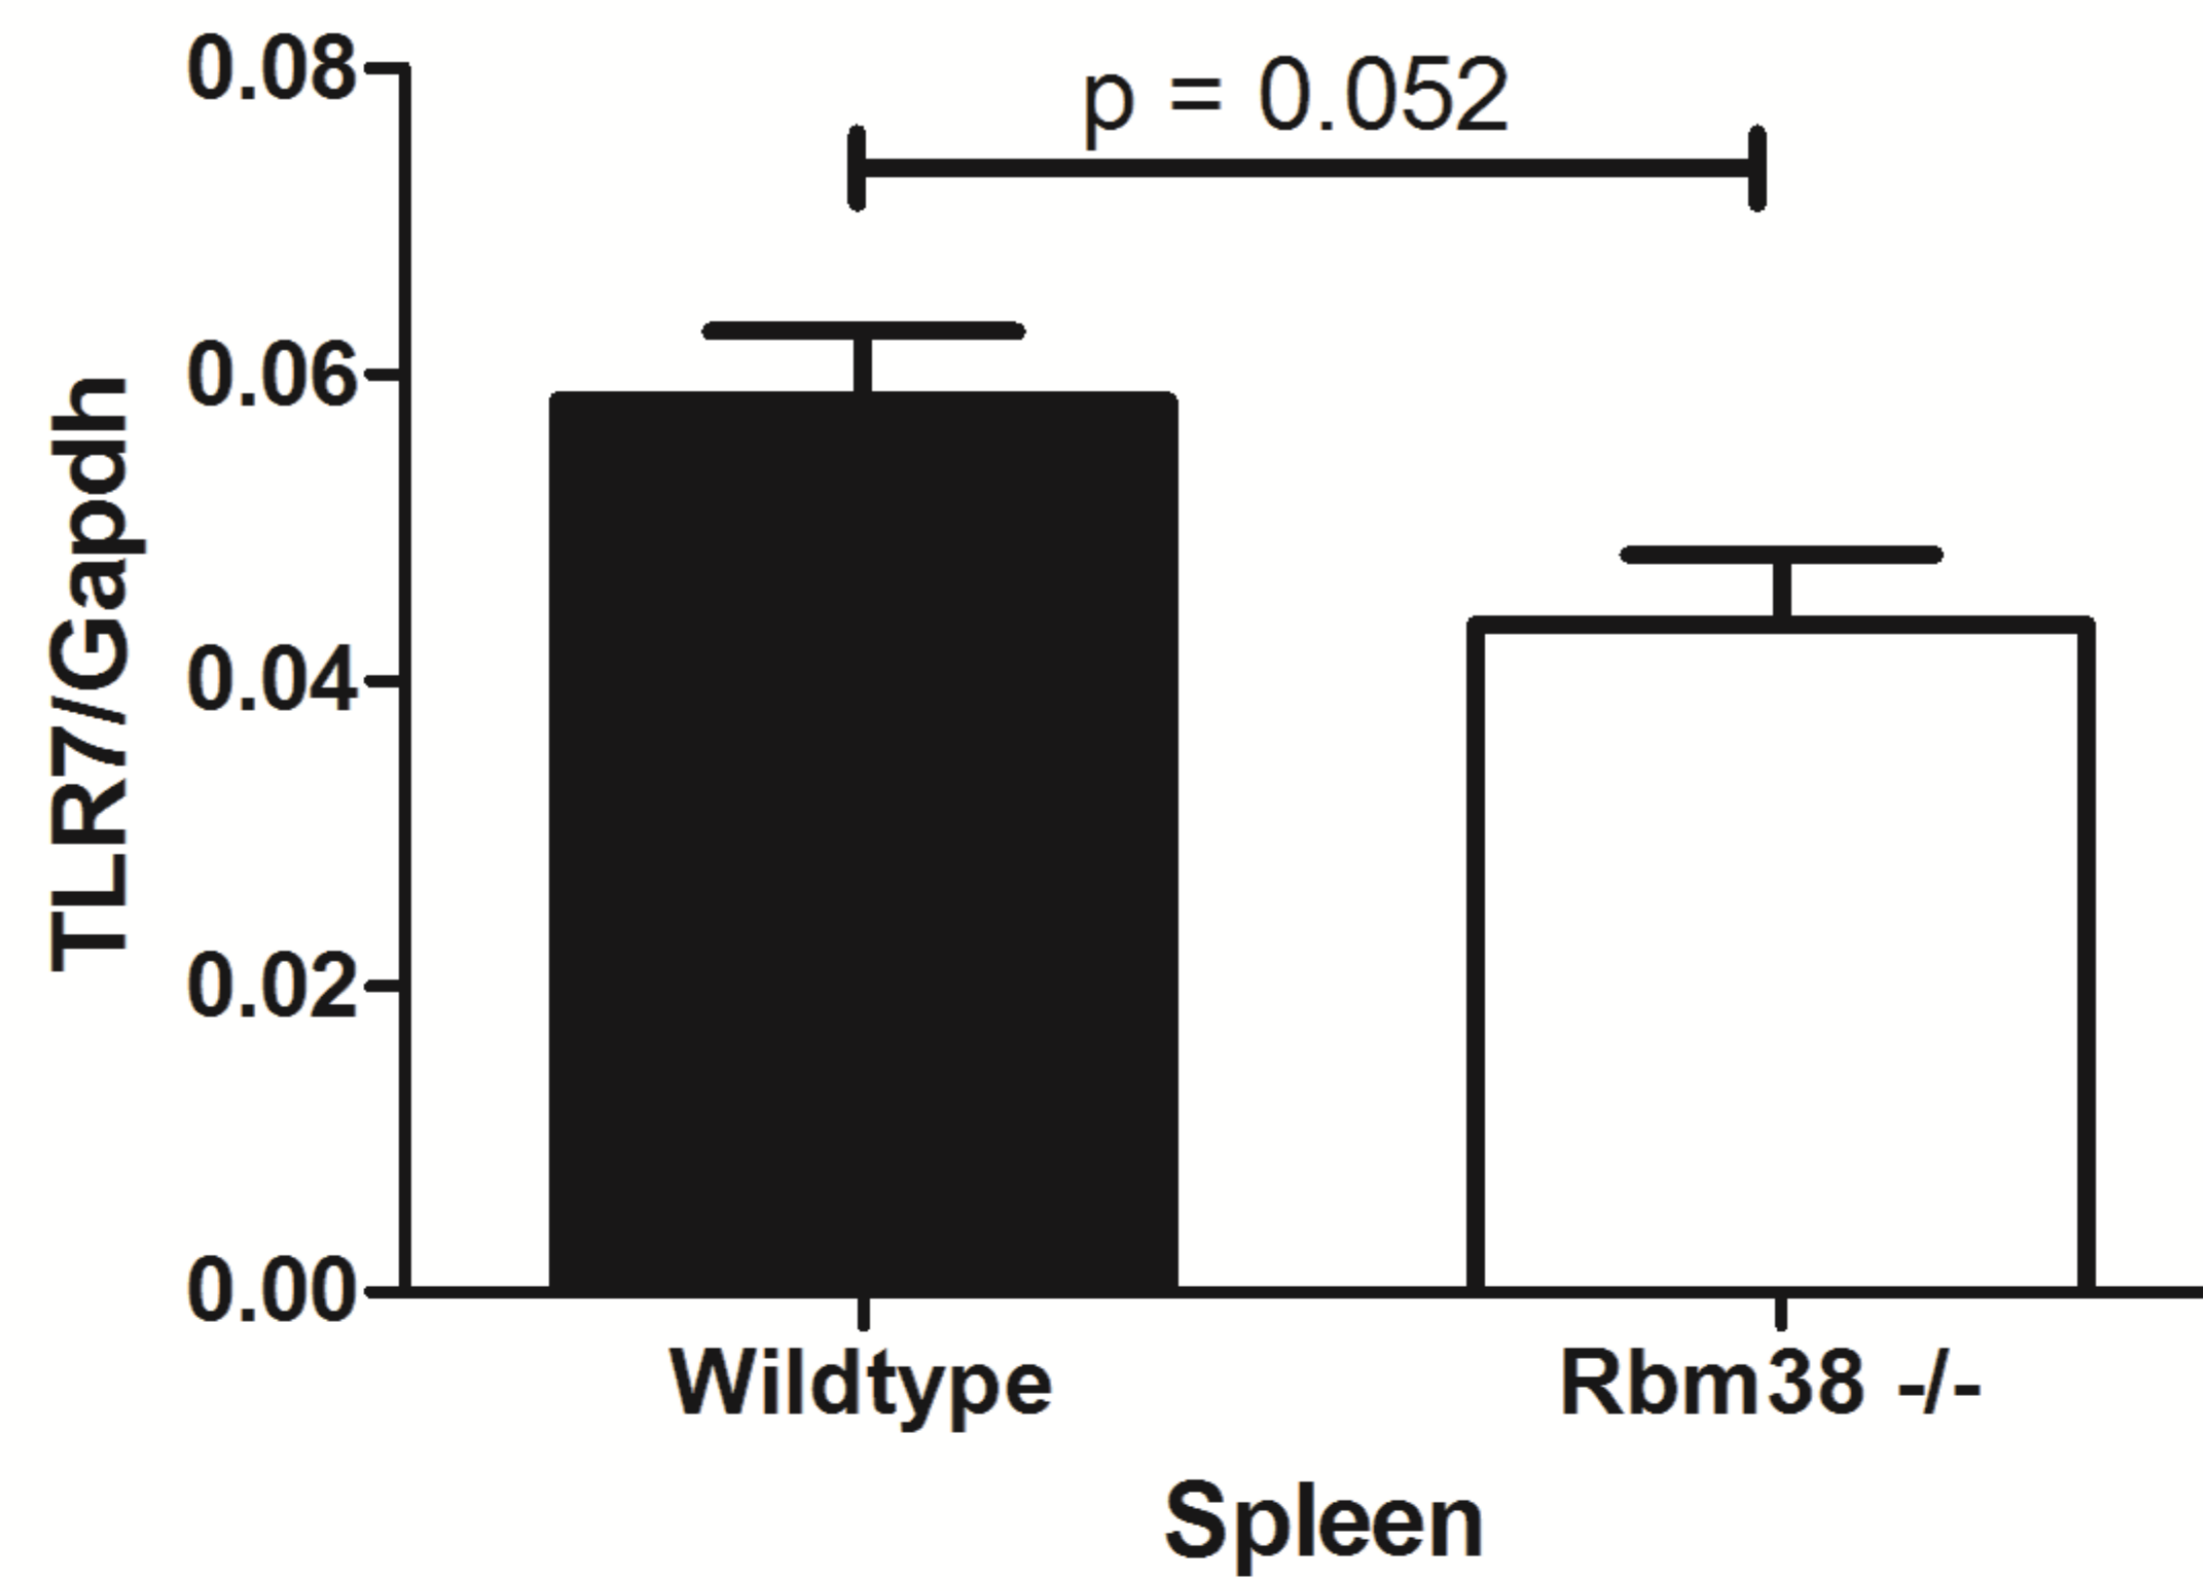

F.

TLR7

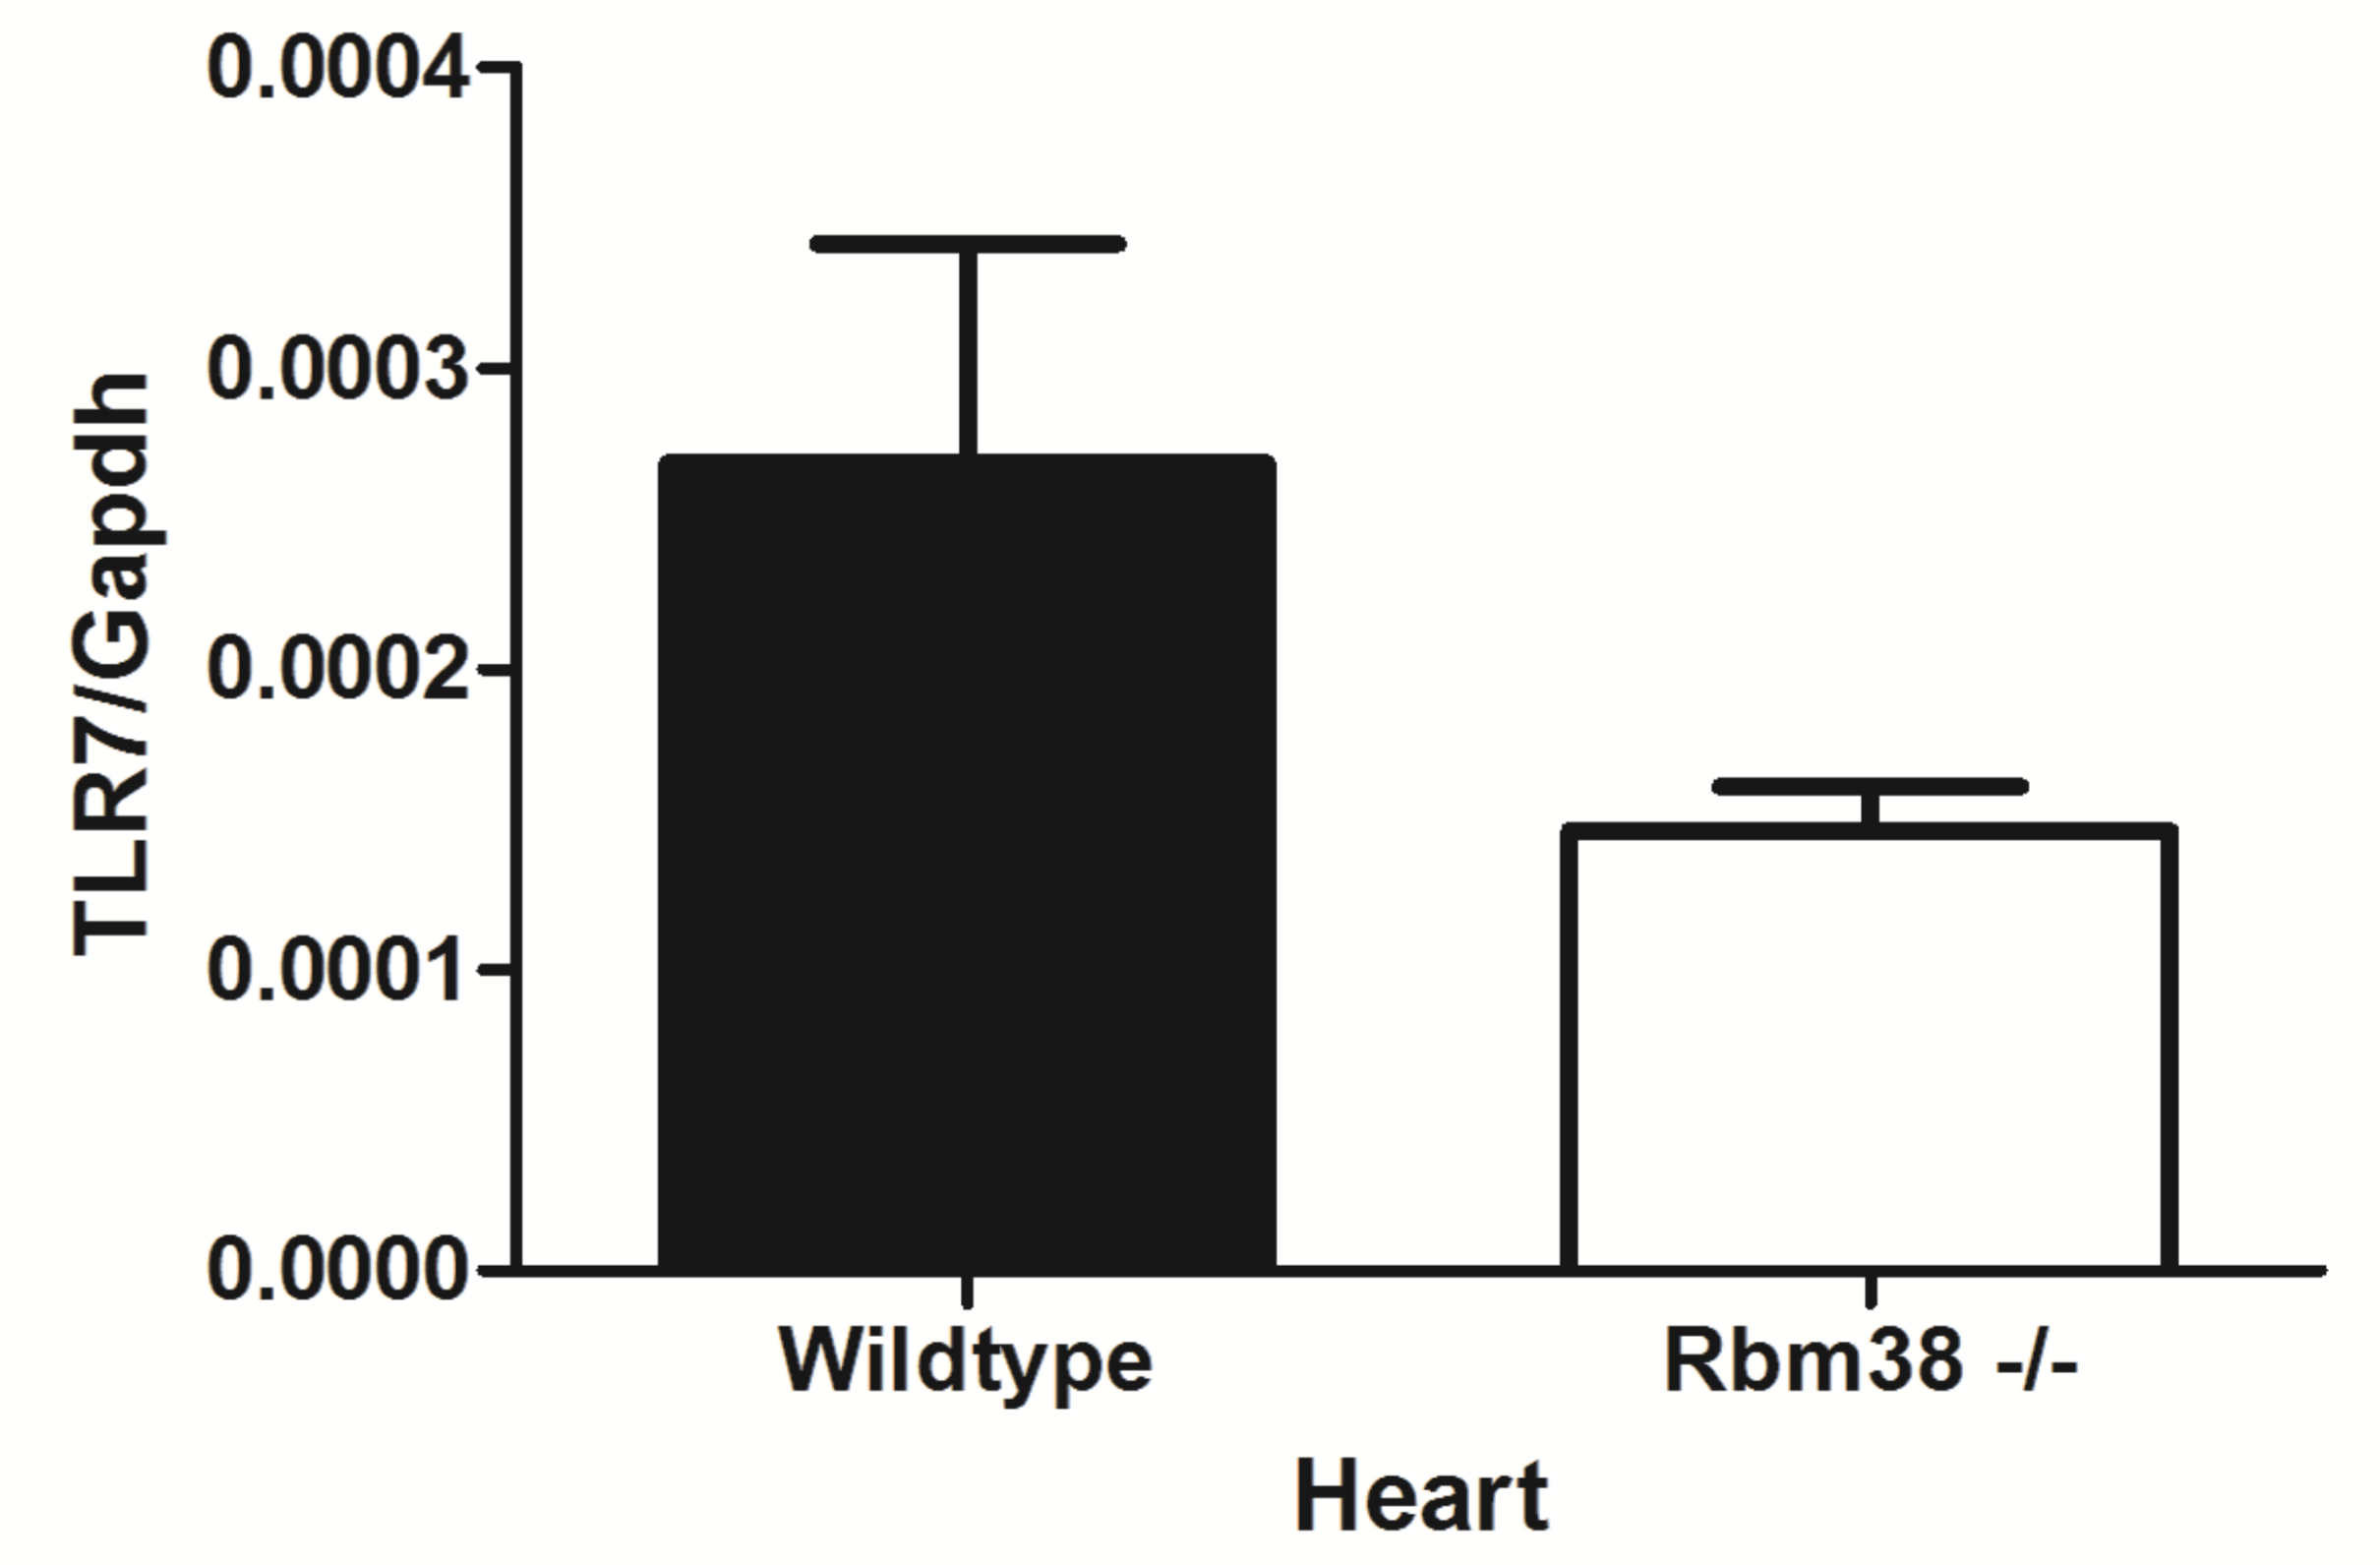

Supplement: pone.0184093.s004.pdf [file pone.0184093.s004.pdf]
