# Supplementary material for: The RNA-binding protein Rbm38 is dispensable during pressure overload-induced cardiac remodeling in mice
Source: PubMed Central journal article supplement (PMC5574583; doi:10.1371/journal.pone.0184093), 2017-08-29

# S5 Figure

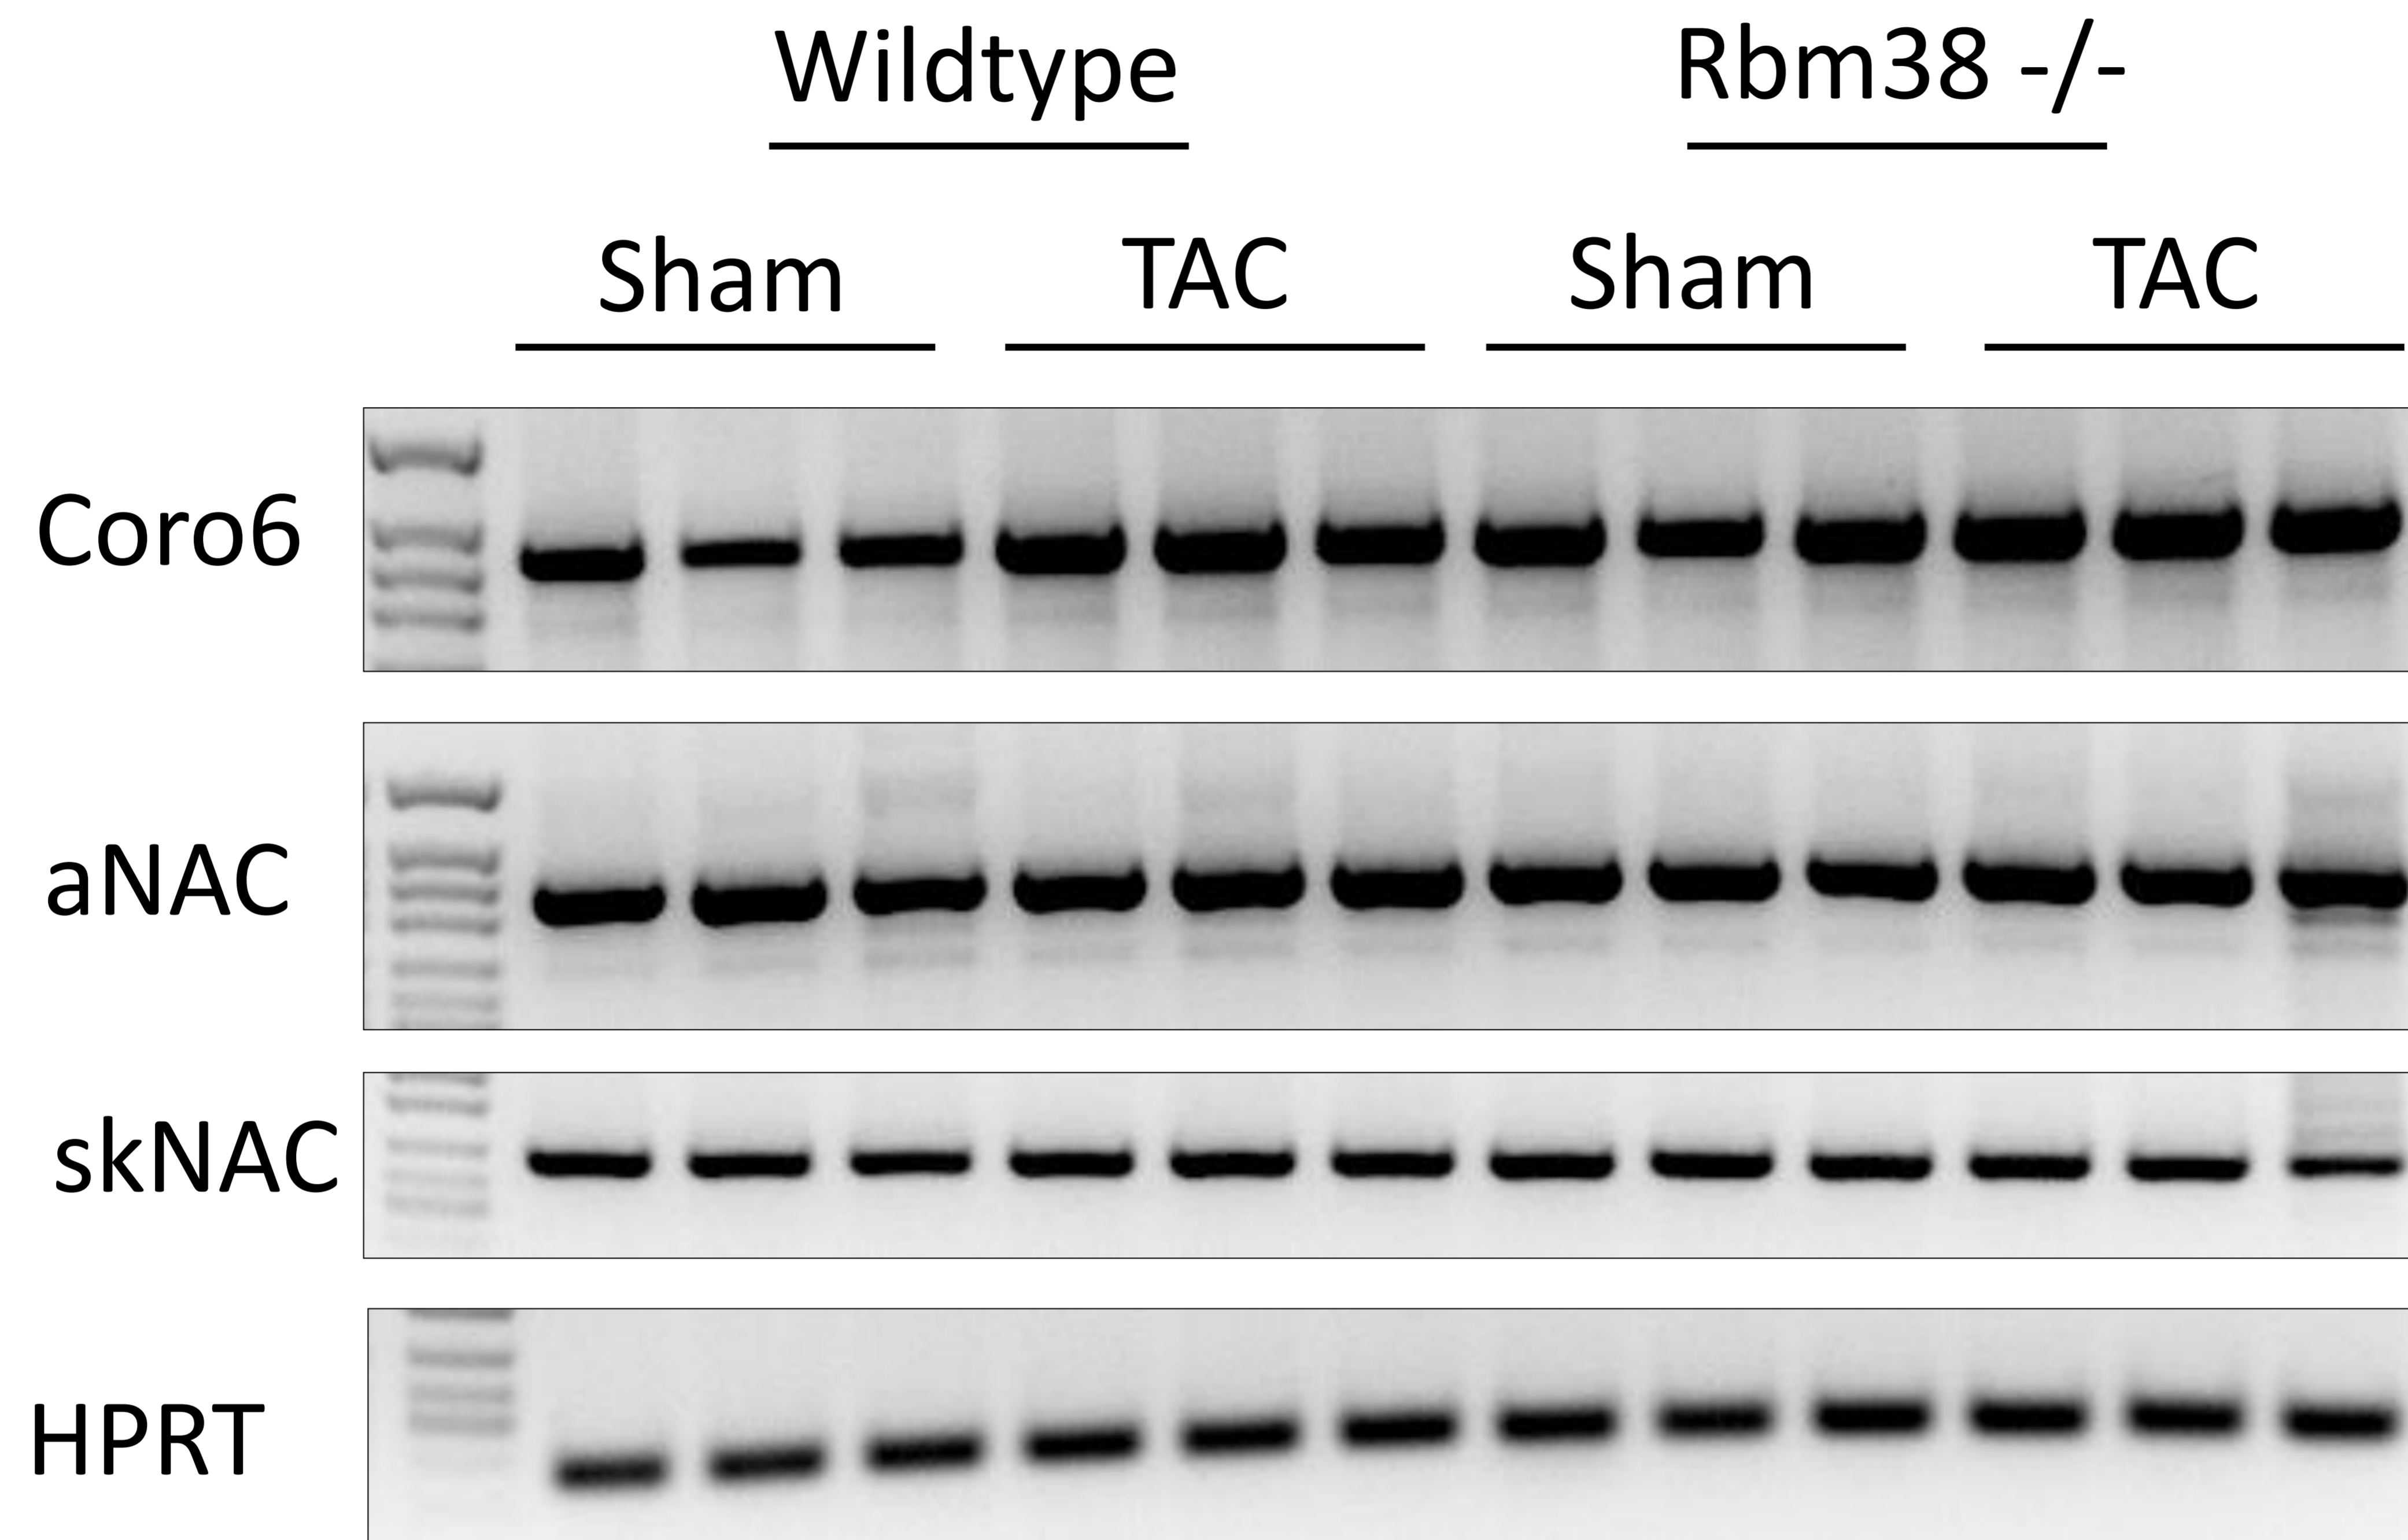

Supplement: pone.0184093.s005.pdf [file pone.0184093.s005.pdf]
