# Supplementary material for: The RNA-binding protein Rbm38 is dispensable during pressure overload-induced cardiac remodeling in mice
Source: PLoS One. 2017 Aug 29;12(8):e0184093. doi: 10.1371/journal.pone.0184093 (PMC5574583; doi:10.1371/journal.pone.0184093)
Supplement: S1 Table — (XLS) [file pone.0184093.s007.xls]

## Sheet: Primers
Primer:	Sequence:	Species:
qPCR:
ANF Fwd	attgacaggattggagcccagagt	mouse
ANF Rev	tgacacaccacaagggcttaggat	mouse
Col1a1 Fwd	CTTCACCTACAGCACCCTTGTG	mouse
Col1a1 Rev	CTTGGTGGTTTTGTATTCGATGAC	mouse
Col3a1 Fwd	TCAAGGCTGAAGGAAACAGCA	mouse
Col3a1 Rev	GATGGGTAGTCTCATTGCC	mouse
HuR Fwd	GCAGAGAGAGCAATCAGC	mouse
HuR Rev	CCGAGAAAACATGTCTTCC	mouse
p21 Fwd	TCCAGACATTCAGAGCCACAG	mouse
p21 Rev	AAAGTTCCACCGTTCTCGGG	mouse
p53 Fwd	GTCACAGTCGGATATCAGC	mouse
p53 Rev	CCTGACACTCGGAGGGCTTC	mouse
p63 Fwd	GCTTCGATGTGTCCTTCCAG	mouse
p63 Rev	GCATGGCACGGATAACAGC	mouse
Rbm24 Fwd	GCCAGCCTGCGCAAGTACTTT	mouse
Rbm24 Rev	GTTGGGATCCTTGCAGGCCCTT	mouse
Rbm38 qPCR Fwd	TGGGTGCCAAGCCTAGGAGCTT	mouse
Rbm38 qPCR Rev	GCTGCACAATGGCTGGTGGGTA	mouse
Rbm38 qPCR set 2 Fwd	GGCAAGTCCCGCGGCTA	mouse /rat
Rbm38 qPCR set 2 Rev	CAAGGTGGGGTGTAGTTGC	mouse/rat
Rbm38 qPCR Fwd	GCTGTCCTCGCCCTACAT	human
Rbm38 qPCR Rev	CACGAAAGTGGTGCCCGC	human
Rbm38 qPCR set 2 Fwd	CTCGCTCAGGAAGTACTTCG	human
Rbm38 qPCR set 2 Rev	GCCAGGTTCACGTTGGCCTTGC	human
Vegfa Fwd	GCACTGGACCCTGGCTTTAC	mouse /rat
Vegfa Rev	CTCCAGGGCTTCATCATTGC	mouse/rat
RT-PCR:
aNAC Fwd	tacagagcaggagttgccac	mouse
aNAC Rev	ctaactgtgcttgctgagac	mouse
Coro6 Fwd	tcatcatctggaatgtgggc	mouse
Coro6 Rev	gtaccgaatgctactgtcac	mouse
Fgfr2 exon8a Fwd	GTGACGGAGATGGATGCTGG	mouse
Fgfr2 exon8b Fwd	GGAATATACGTGCTTGGC	mouse
Fgfr2 exon9 Rev	GCAGGCGATTAAGAAGACC	mouse
Mef2d exona1 Fwd	GGACTCACTGGAGCAGAGC	mouse
Mef2d exona2 Fwd	GCAGAGTTATAGACTGG	mouse
Mef2d Rev	GCTGAACTGCATGGAGC	mouse
Rbm38 transcript in WT and KO mice Fwd	GGAGTAGACGCTTCGCG	mouse
Rbm38 transcript in WT and KO mice Rev	GCTGCACAATGGCTGGTGGGTA	mouse
skNAC Fwd	tacagagcaggagttgccac	mouse
skNAC Rev	gcagtttcagctgttatggg	mouse
REFERENCE GENES:
GAPDH Fwd	GGTGGACCTCATGGCCTACA	mouse
GAPDH Rev	CTCTCTTGCTCAGTGTCCTTGCT	mouse
HPRT Fwd	cctaagatgagcgcaagttgaa	mouse
HPRT Rev	ccacaggactagaacacctgctaa	mouse
Pgk1 Fwd	GTCGTGATGAGGGTGGACTT	mouse
Pgk1 Rev	AAGGACAACGGACTTGGCTC	mouse
Rpl32 Fwd	GCCTCTGGTGAAGCCCAAG	mouse
Rpl32 Rev	TTGTTGCTCCCATAACCGATGT	mouse
Tbp Fwd	TATGACCCCTATCACTCCTG	mouse
Tbp Rev	TTCTTCACTCTTGGCTCCTGT	mouse
B2M Fwd	CACCCCCACTGAAAAAGATG	human
B2M Rev	AGCAACCAAGCAGAATTTGG	human
GAPDH Fwd	ACCCACTCCTCCACCTTTGAC	human
GAPDH Rev	ACCCTGTTGCTGTAGCCAAATT	human
HPRT Fwd	TGACACTGGCAAAACAATGCA	human
HPRT Rev	GGTCCTTTTCACCAGCAAGCT	human
HPRT Fwd	TGACTATAATGAGCACTTCAGGGATTT	rat
HPRT Rev	CGCTGTCTTTTAGGCTTTGTACTTG	rat

## Sheet: Antibodies
Protein:	Manufacturer:	Product#:
Rbm24	Sigma	SAB2104677
HuR	Santa Cruz	3A2, sc5266
Gapdh	Santa Cruz	G-9, sc365062
Gapdh	Fitzgerald	10R-G109A
ANF	Research & Diagnostics	AS-618
Calnexin	Calbiochem	208880
p53	Cell Signaling	1C12
p53	Santa Cruz	FL-393, sc6243
α-Actinin	Sigma	A7811
